# Supplementary material for: Nosocomial dissemination of hypervirulent Klebsiella pneumoniae with high-risk clones among children in Shanghai
Source: Frontiers journal article supplement (doi:10.3389/fcimb.2022.984180), 2022-08-29
Supplement: Data_Sheet_1.pdf [file Data_Sheet_1.pdf]

## Supplementary-Figures

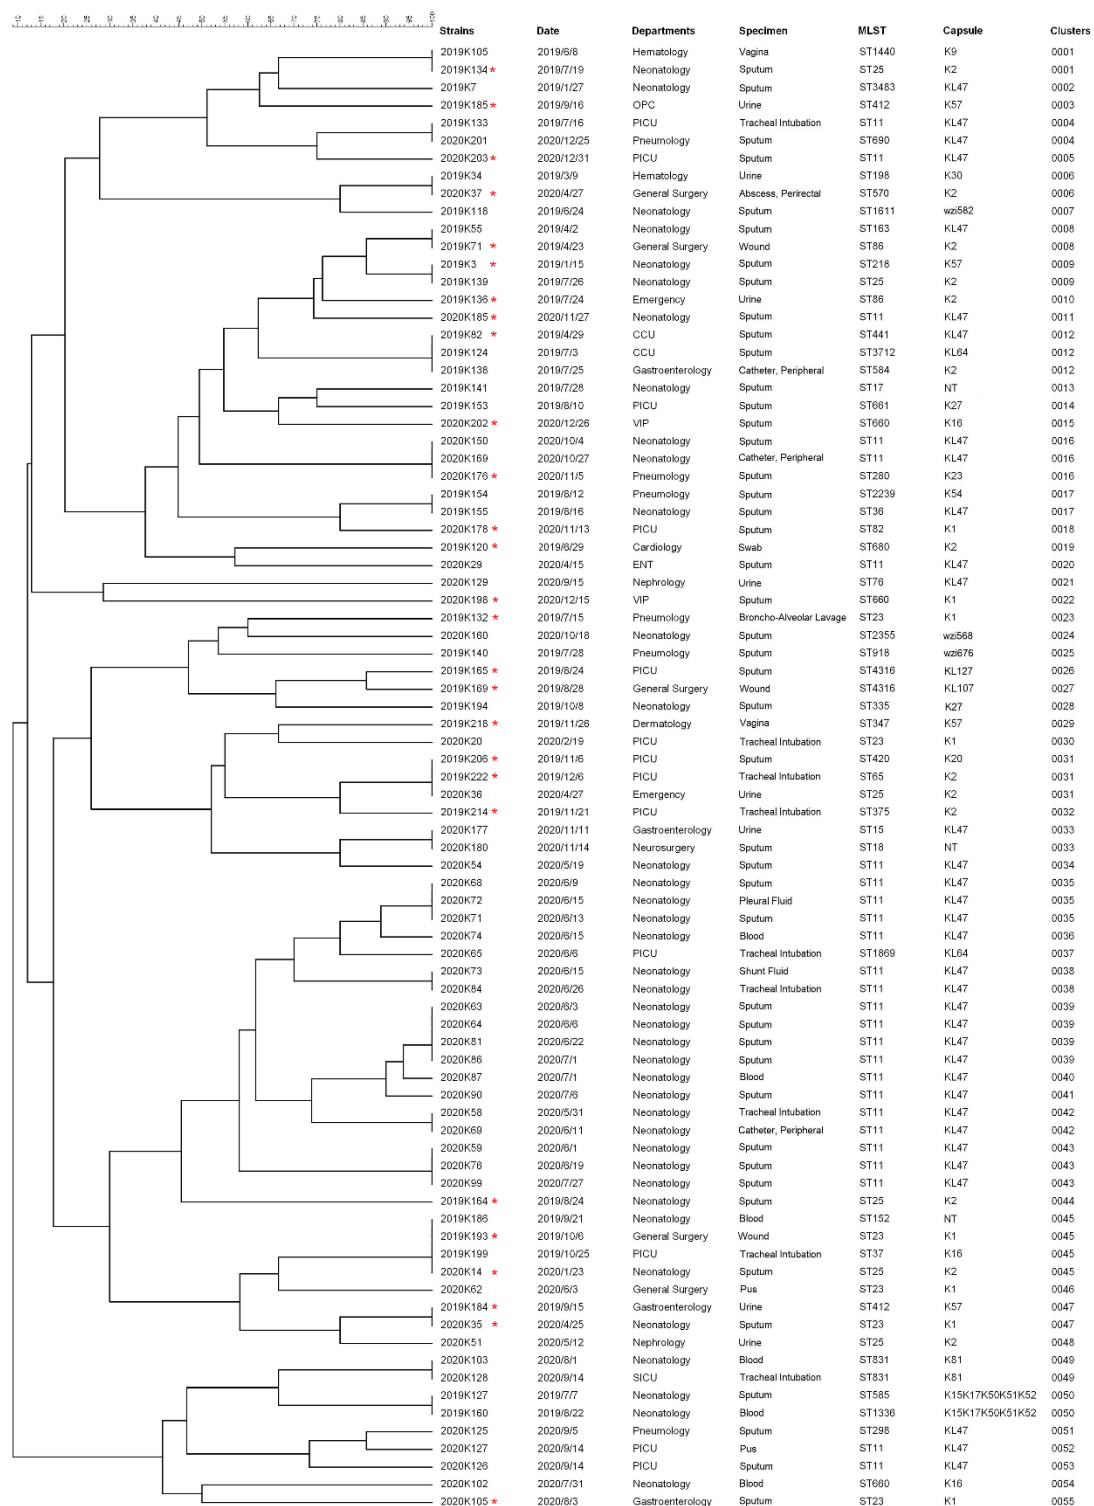

**FIGURE S1** Phylogenetic tree of hypervirulence genes positive *K. pneumoniae* (hgKp) isolates (n = 83). The evolutionary analysis for finger printing profiles of Intergenic Consensus-Polymerase Chain Reaction (ERIC-PCR) was performed by BioNumerics software. Strains marked red “\*” were hypervirulent *K. pneumoniae*.



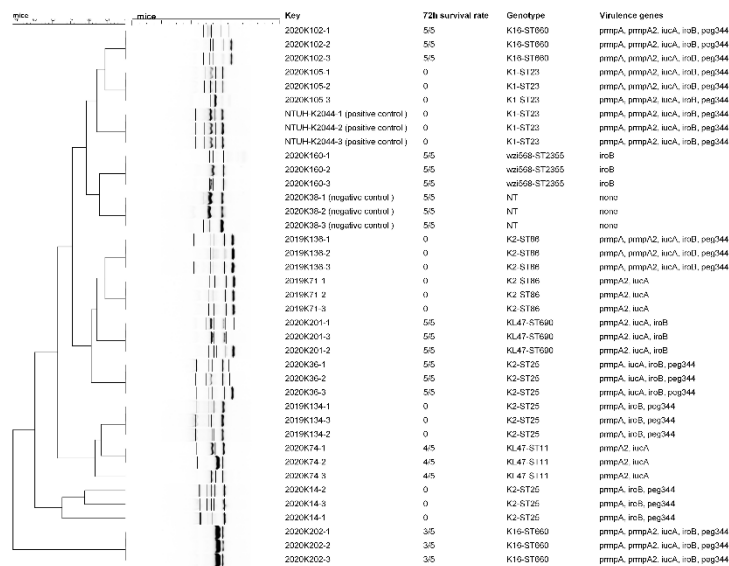

**FIGURE S3** Homology of randomly selected strains (n = 11) used to build murine sepsis model. Strains-1, strains before mice injection; Strains-2 and Strains-3, strains recovered from a separate portion of the harvested livers of the injected mice. Fresh livers were grinded in paraformaldehyde-free PBS. Bacteria in supernatant were cultured on blood agar plate at 37 °C overnight, and identified by MALDI-TOF mass spectrometry. The evolutionary analysis for finger printing profiles of Intergenic Consensus-Polymerase Chain Reaction (ERIC-PCR) was performed by BioNumerics software.

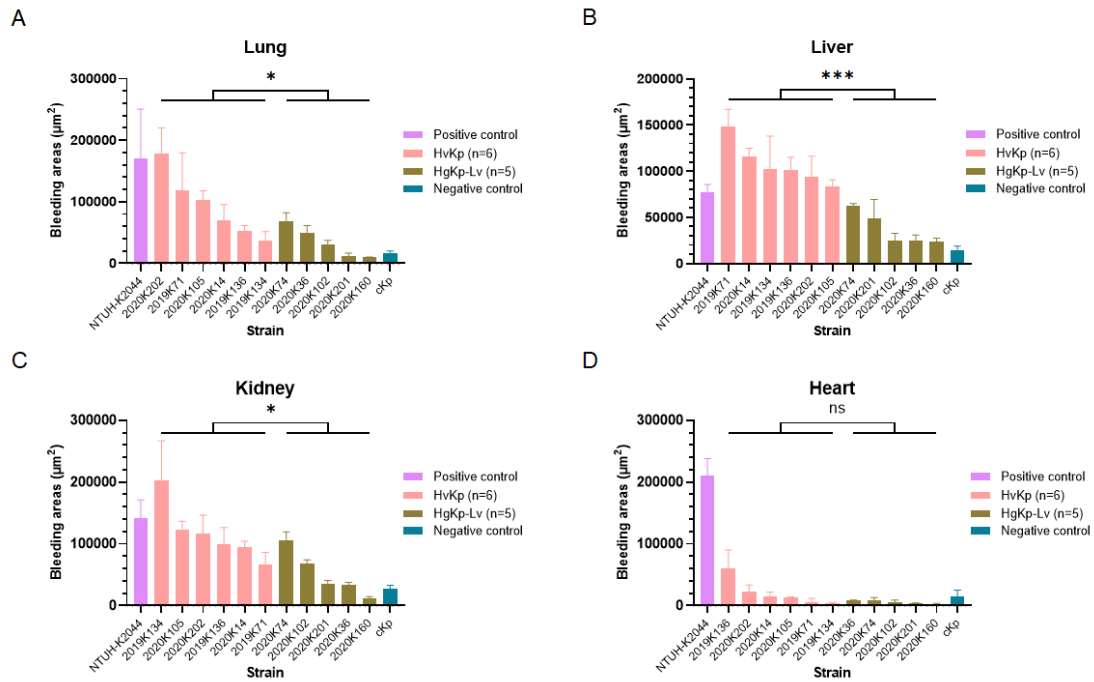

**FIGURE S4** Damage of hvKp infection to mice. Data of organs bleeding areas were expressed as means  $\pm$  SDs,  $P < 0.05$  (\*),  $P < 0.001$  (\*\*\*) and  $P > 0.05$  (ns). Between hvKp and hgKp-Lv isolates infected mice, significant differences were observed in the bleeding areas of lung ( $t = 2.33$ ,  $P = 0.0446$ , 95% confidence interval [CI] = 42018 to 98612), of liver ( $t = 5.62$ ,  $P = 0.0003$ , 95% CI = 1776.2 to 116974), of kidney ( $t = 2.58$ ,  $P = 0.0298$ , 95% CI = 8126.2 to 124402), but not of heart ( $t = 1.66$ ,  $P = 0.1558$ , 95% CI = -7219 to 35917) using independent-samples t-test.

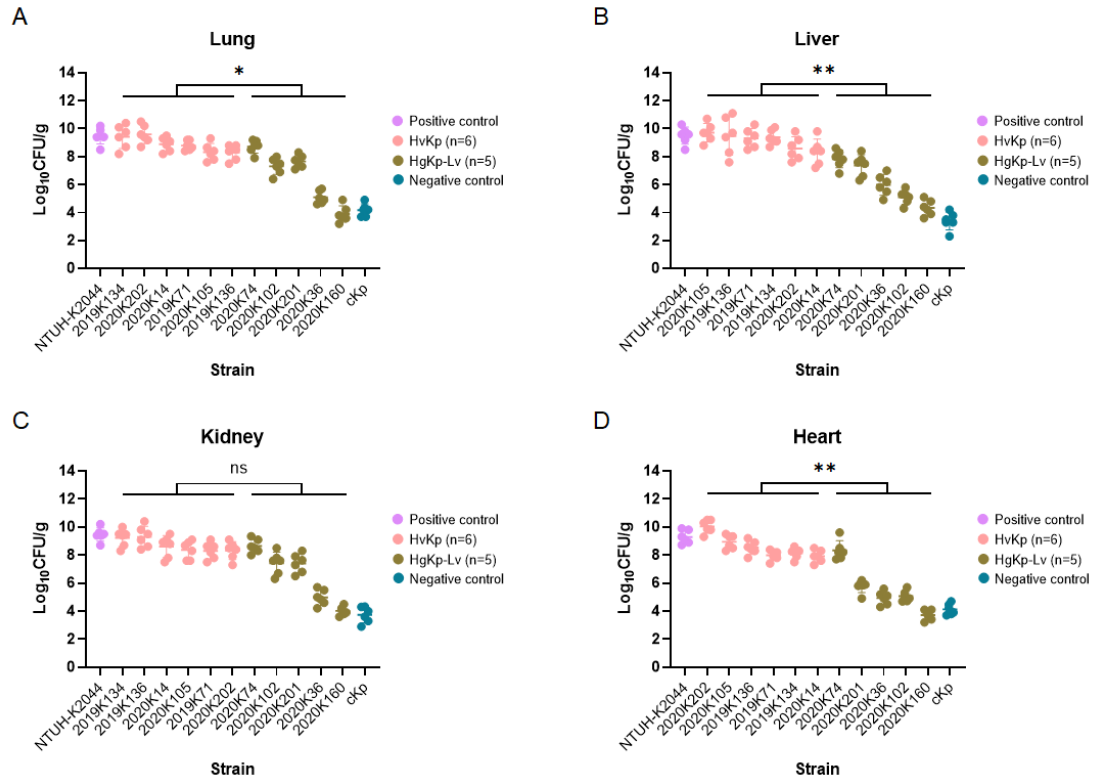

**FIGURE S5** Bacterial burdens in the mice organs. Data shown are means  $\pm$  SDs,  $P < 0.05$  (\*),  $P < 0.01$  (\*\*) and  $P > 0.05$  (ns). Between hvKp and hgKp-Lv isolates infected mice, significant differences were observed in bacterial CFU of lung ( $t = 2.81$ ,  $P = 0.0205$ , 95% confidence interval [CI] = 6.6 to 9), of liver ( $t = 4.64$ ,  $P = 0.0012$ , 95% CI = 6.5 to 9), of heart ( $t = 3.87$ ,  $P = 0.0038$ , 95% CI = 5.9 to 8.5), and a slight difference was observed of kidney ( $t = 2.53$ ,  $P = 0.0596$ , 95% CI = 6.5 to 8.8) using independent-samples t-test.
